# Supplementary material for: Recurrently deregulated lncRNAs in hepatocellular carcinoma
Source: PubMed Central journal article supplement (PMC5316832; doi:10.1038/ncomms14421), 2017-02-13
Supplement: ncomms14421-s1.pdf [file ncomms14421-s1.pdf]

# Supplementary Information

## A. Transcript level

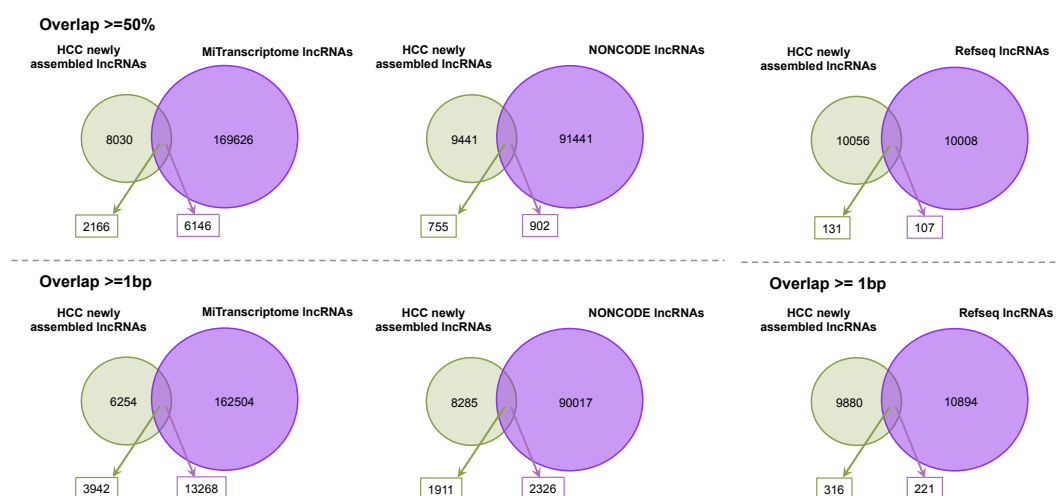

## B. Gene level

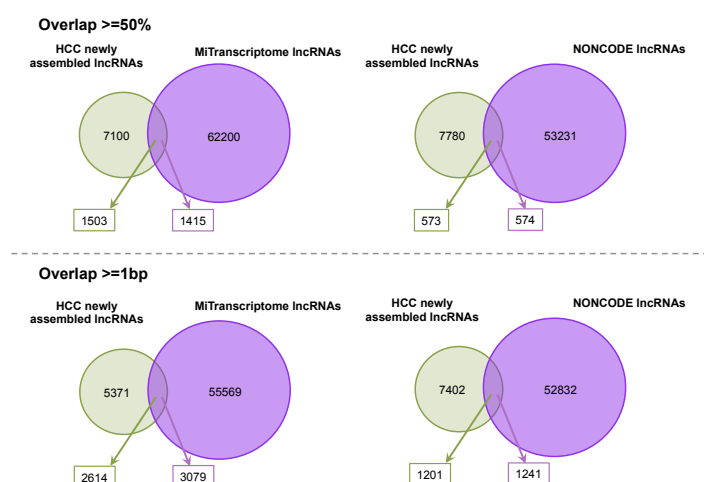

**Supplementary Figure 1. Overlap of newly assembled lncRNAs with other lncRNA sets: MiTranscriptome (TCGA), NONCODE and RefSeq lncRNAs.** The MiTranscriptome lncRNAs were downloaded from a study on TCGA poly(A)+ RNA-seq data<sup>1</sup>. The NONCODE lncRNAs were downloaded from NONCODE database (V4)<sup>2</sup>. The RefSeq lncRNAs were downloaded from NCBI (Release 72) (<http://www.ncbi.nlm.nih.gov/refseq>)<sup>3</sup>. The numbers in **(A)** are counting on transcripts, the numbers in **(B)** are counting on genes, each of which could include multiple transcripts, because RefSeq only provides lncRNA annotation in transcript format. The numbers in the upper panel of each plot are counted when the overlapping is larger or equal to 50% of the gene/transcript length. The numbers in the lower panel are counted when overlapping is larger or equal to 1bp.

**A.**

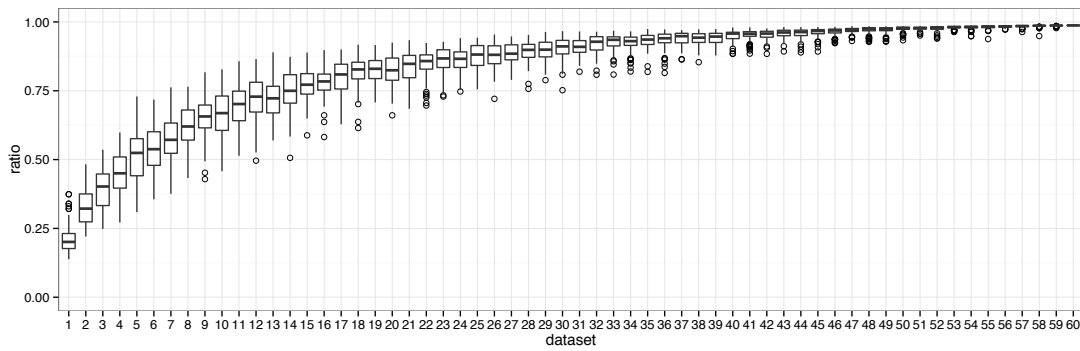

**B.**

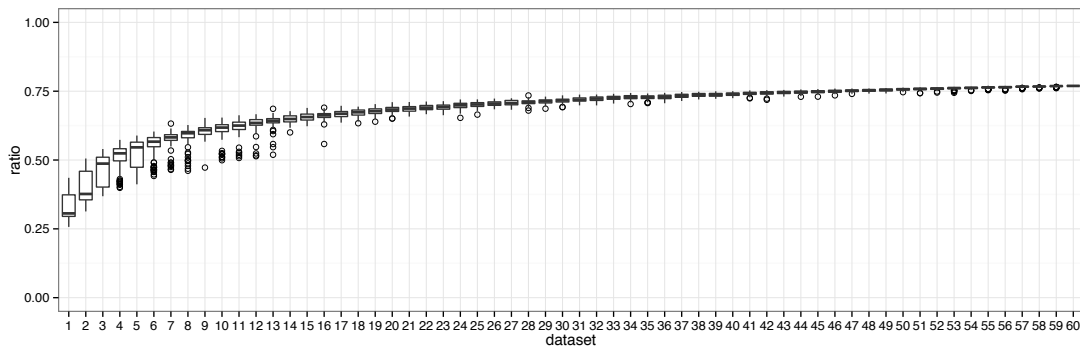

**C.**

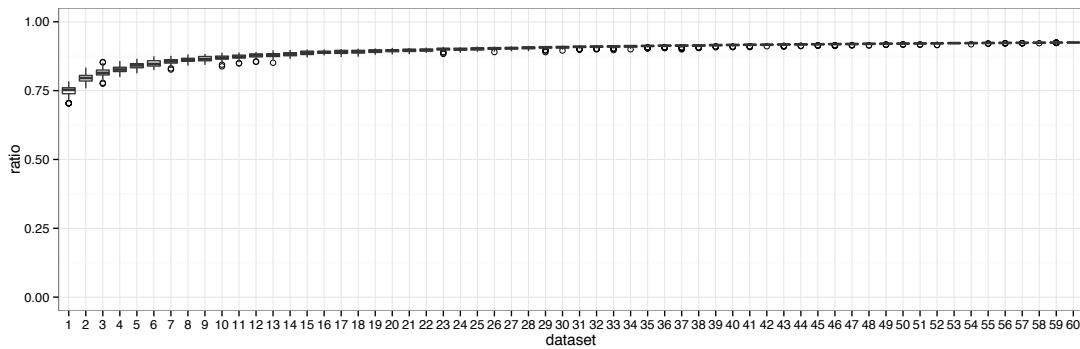

**Supplementary Figure 2. Saturation plots in the 60 samples we sequenced.** 60 datasets were used to calculate the expression ratios of newly assembled lncRNAs, GENCODE lncRNAs and protein-coding genes, The FPKM  $\geq 0.1$  is set as the expression cutoff. Each point at a given number of considered datasets corresponds to different combination of datasets. The figure depicts saturation plot for newly assembled lncRNAs (**A**), GENCODE lncRNAs (**B**) and protein-coding genes (**C**)

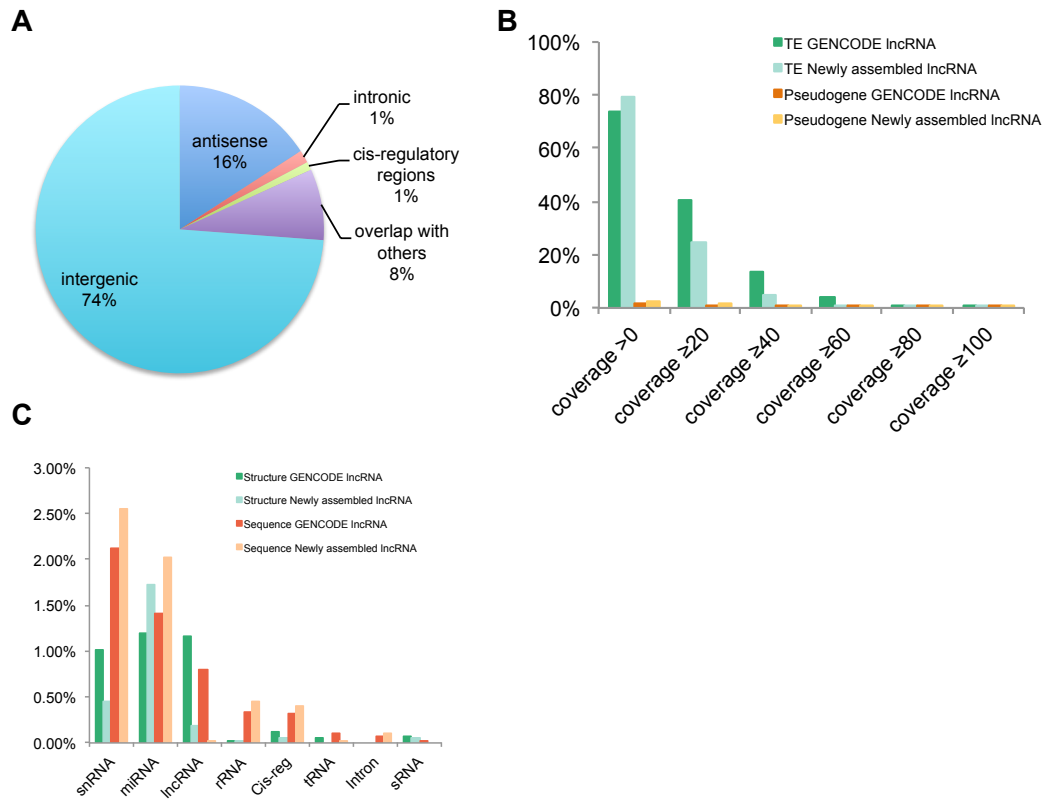

**Supplementary Figure 3. LncRNAs' genomic positions and overlapped genomic elements.** (A) Classification of newly assembled lncRNAs according to their genomic locations with respect to GENCODE v19. Antisense, overlapped with protein-coding genes (including exonic, intronic, up- and down- stream 2K regions) in the antisense strand. Intronic, located within the intronic regions of protein-coding genes in same strand. Cis-regulatory region, overlapped with cis-regulatory regions (up- and down- stream 2K regions, no exonic overlap) of protein-coding genes in the same strand. Overlap with others, overlapped with other types of annotated transcripts in either strand. Intergenic, all remaining lncRNAs. (B) Overlap with pseudogenes and transposable elements. The annotation of transposable elements is downloaded using UCSC table browser. The pseudogene annotation is from GENCODE v19. All lncRNAs overlapped these elements in either strand is counted. Coverage is calculated as the length of overlapped exonic regions to the length of lncRNAs. The ratio of all lncRNAs overlapped with TE (coverage>0) is nearly 80%, which is consistent with previous studies<sup>4</sup>. (C) Number of lncRNAs containing conserved domains/motifs at sequence and structure levels. Structure search to conserved RNA models in Rfam is performed using *cmscan*. Sequence search to conserved RNA models in Rfam is performed using *blast*.

**A**

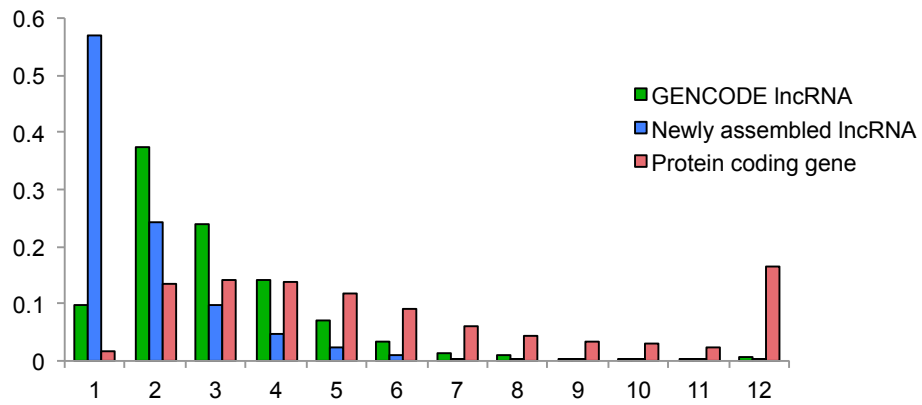

**B**

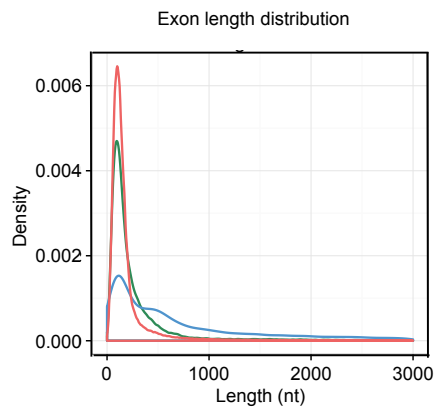

**C**

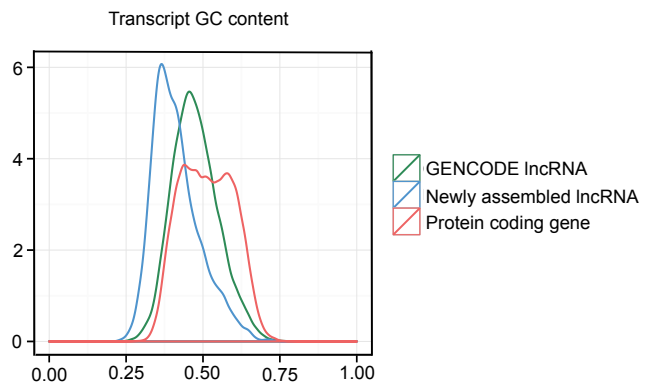

**Supplementary Figure 4. Additional characterization of lncRNAs.** Additional characteristics comparison among GENCODE lncRNA, newly assembled lncRNA and protein-coding genes. **(A)** The number of exons per transcript. **(B)** Exon size distribution. **(C)** Transcript GC content.

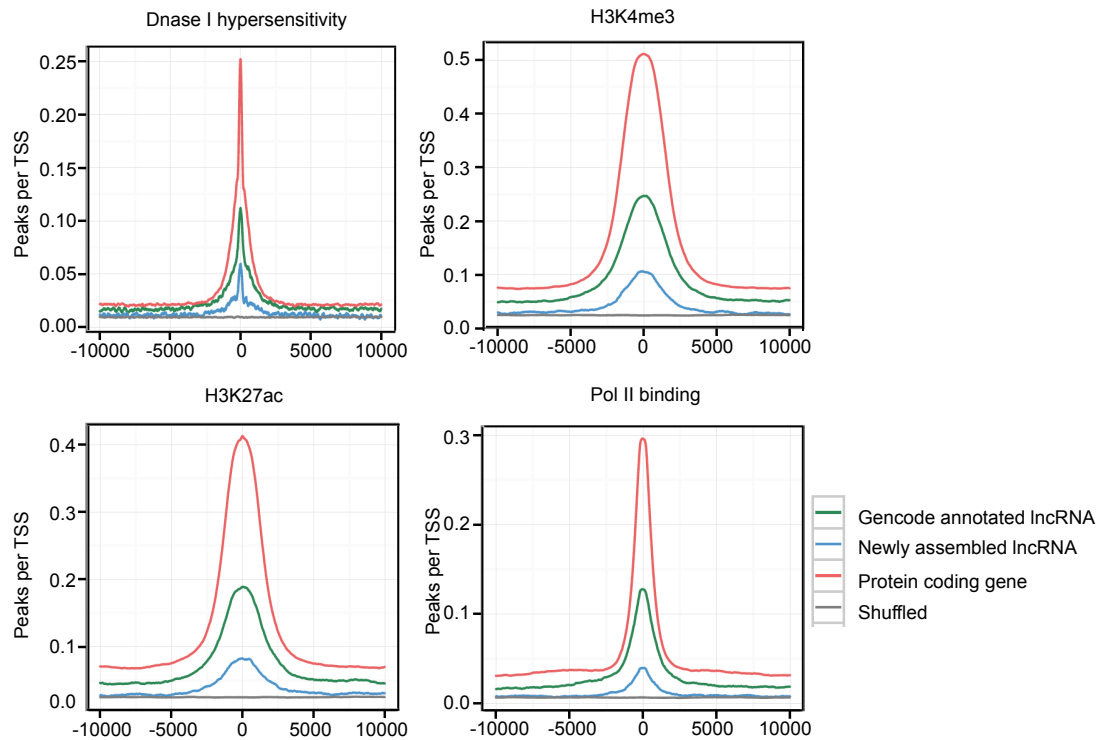

**Supplementary Figure 5. Aggregation plots for signals of active markers.** We utilized ENCODE Project data sets<sup>5</sup> to show the signal enrichment of different modification signals around the transcription start site (TSS) of different kinds of transcripts. The processed signals of H3K4me3, H3K27ac, DNase I hypersensitivity and Pol II binding data of XX cell lines were downloaded from the UCSC Genome Browser (<https://genome.ucsc.edu/>). The aggregation plots were drawn around each TSS (upstream and downstream 10K nt) for each gene category (e.g. lncRNA, protein-coding gene, etc).

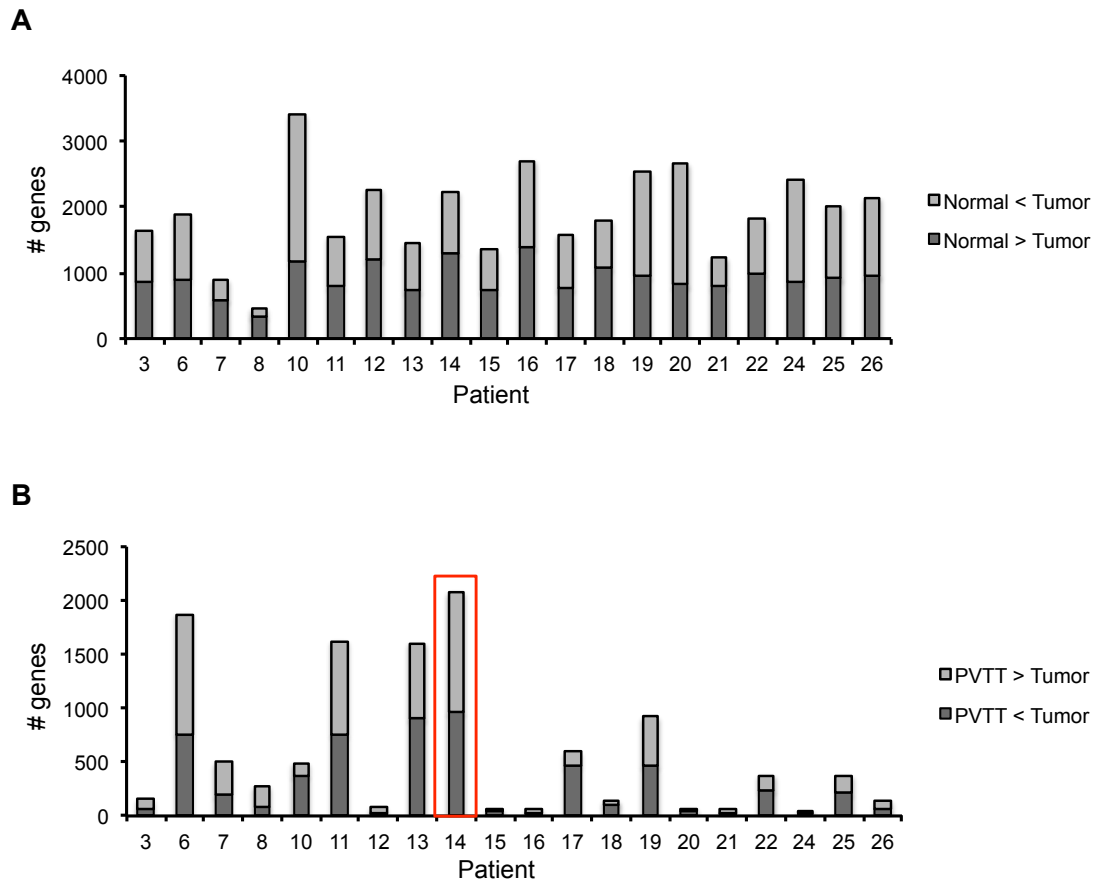

**Supplementary Figure 6. Differentially expressed lncRNAs in individual patients defined by GFOLD.** The bar plots depict the number of differentially expressed lncRNAs in each individual patient. **(A)** Tumorigenesis-associated, that is, differentially expression between primary tumor and adjacent normal tissue. **(B)** Metastasis-associated, that is, differentially expression between primary tumor and PVTT. Patient 14 is not included for PVTT because the sample was contaminated.

**A**

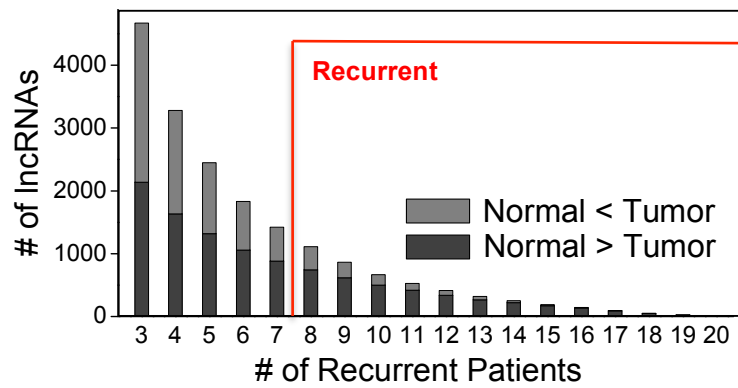

**B**

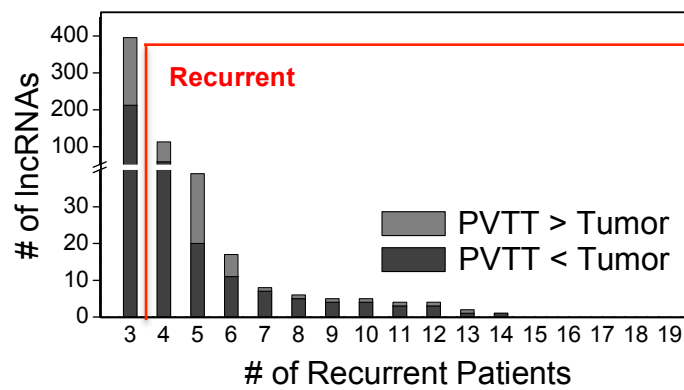

**Supplementary Figure 7. Recurrence of the differentially expressed lncRNAs defined by GFOLD.** The bar plots depict the recurrence of differentially expressed lncRNAs. (A) Tumorigenesis associated, that is, differentially expressed lncRNAs between adjacent normal tissues and primary tumors, including normal > tumor and normal < tumor; (B) Metastasis associated, that is, differentially expressed lncRNAs between primary tumors and PVTTs, including tumor > PVTT and tumor < PVTT. The axis is the number of patients in which the lncRNAs were differentially expressed. Patient 14 is not included for PVTT because the sample was contaminated.

**A**

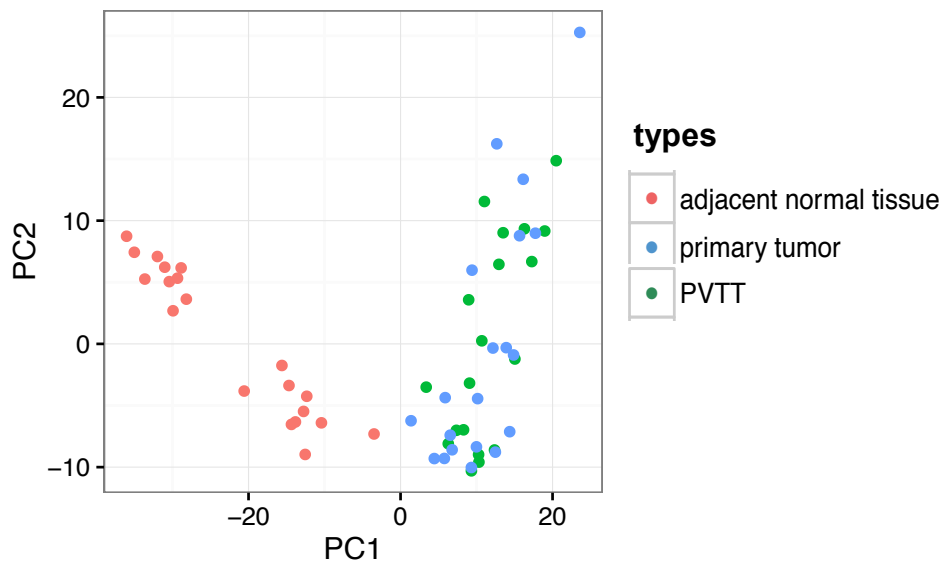

**B**

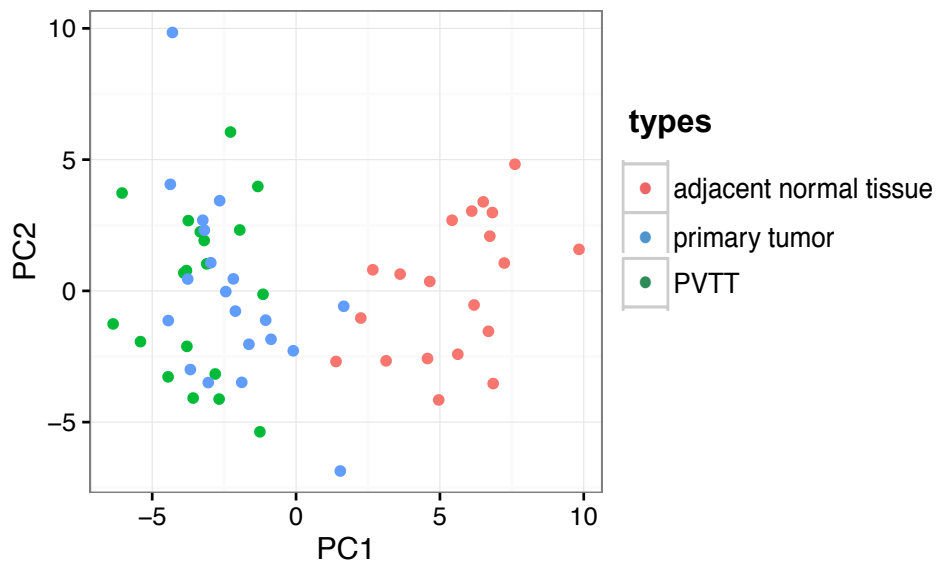

**Supplementary Figure 8. PCA based on the expression profile of recurrently deregulated lncRNAs. (A) Tumorigenesis-associated recurrently deregulated lncRNAs. (B) Metastasis-associated recurrently deregulated lncRNAs.**



**A.**

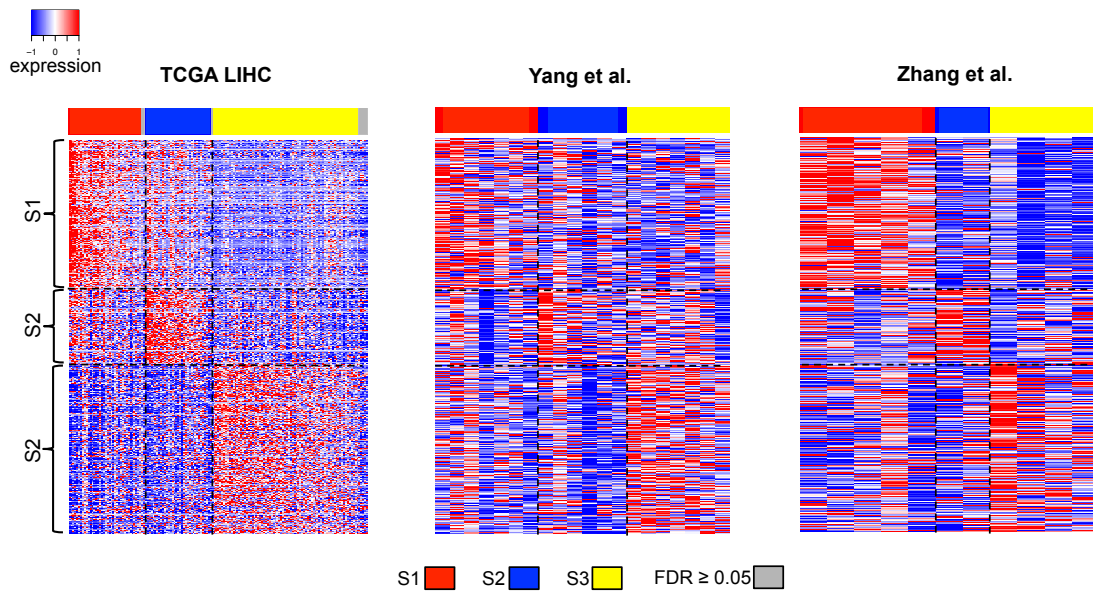

**B.**

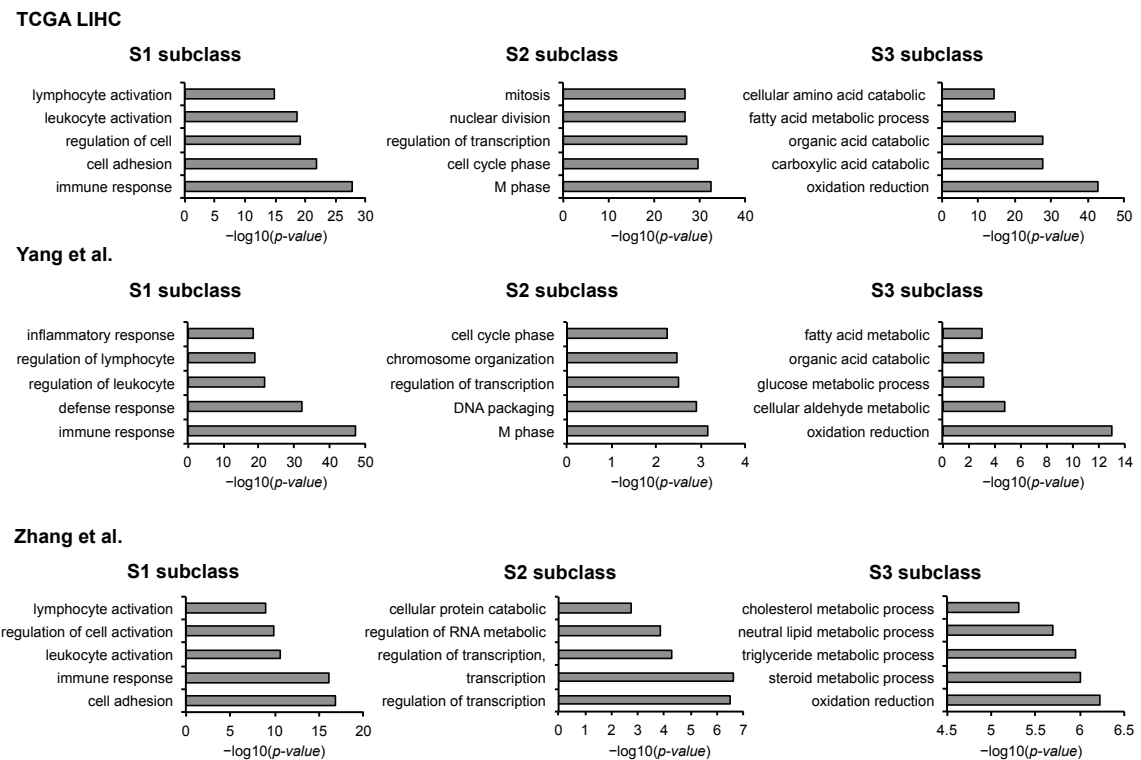

**Supplementary Figure 9. Molecular classification of HCC.** The HCC tumors from TCGA LIHC study, our study (Yang et al.) and another published study (Zhang et al.)<sup>6</sup> were clustered into three HCC subclasses (S1, S2 and S3) based on 619 signature genes<sup>7, 8</sup>. **(A)** The heatmaps depict the gene expression profile of the 619 genes in each HCC subclass. High and low expression levels are represented by red and blue color in the heatmaps, respectively. Predicted subclasses are shown in the colorbar using red (S1), blue (S2), yellow (S3) and the samples with low confident prediction

(FDR  $\geq$  0.05) were labeled in grey. **(B)** The bar plots depict GO enrichment for the upregulated protein-coding genes in each HCC subclass, which was consistent with previous study<sup>7,8</sup>.

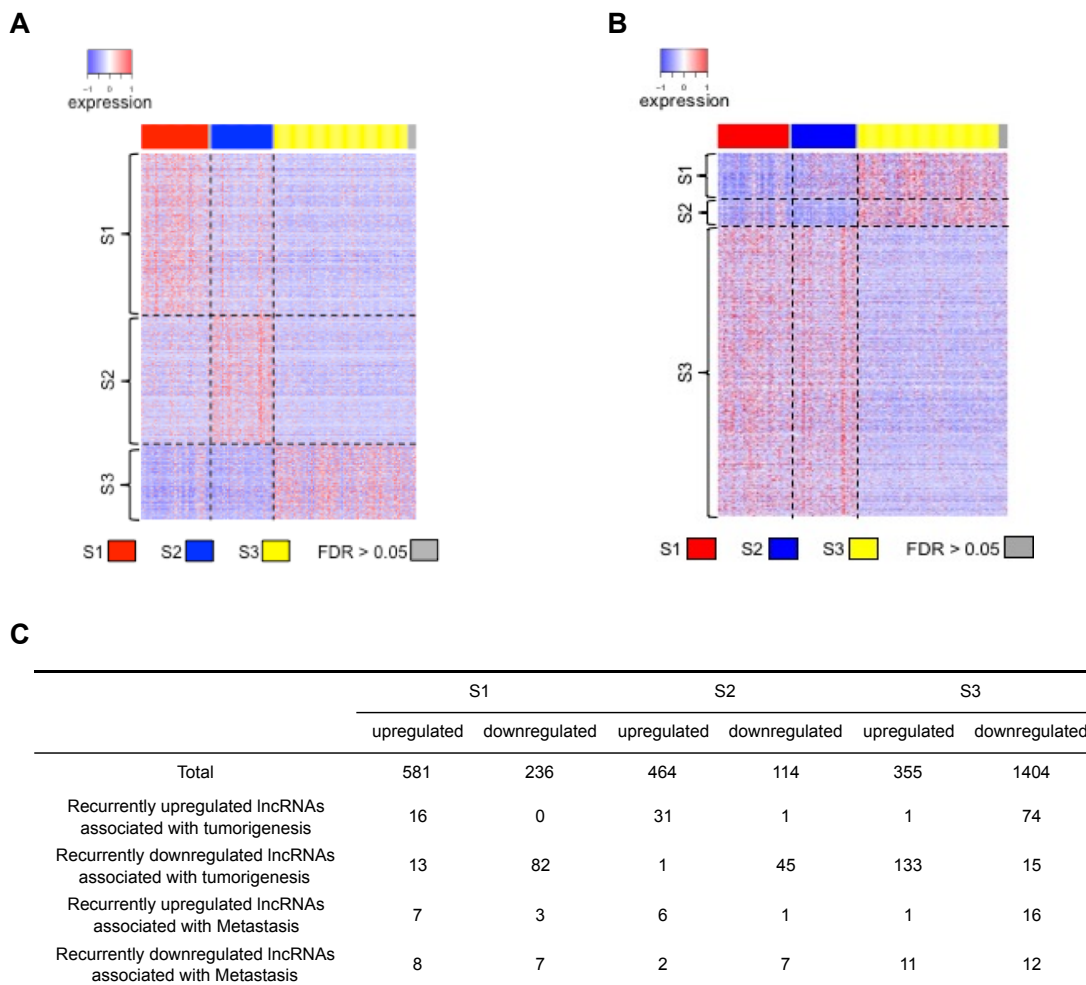

**Supplementary Figure 10. Significantly deregulated lncRNAs in each subclass.**

Significantly deregulated lncRNAs in each HCC subclass. The upregulated (**A**) and downregulated (**B**) lncRNAs were defined by Wilcoxon rank-sum tests ( $q$ -value  $< 0.05$  and fold change  $> 2$ ) on TCGA expression data, comparing one subclass with the other two. High and low expression levels are represented by red and blue color in the heat-maps, respectively. Predicted subclasses are shown in the color bar using red (S1), blue (S2), yellow (S3) and the samples with low confident prediction ( $FDR \geq 0.05$ ) were labeled in grey. (**C**) Summary of total lncRNAs, recurrently deregulated lncRNAs associated with tumorigenesis and recurrently deregulated lncRNAs associated with metastasis, which were deregulated in each subclass. The details were listed in Supplementary File 7.

**A**

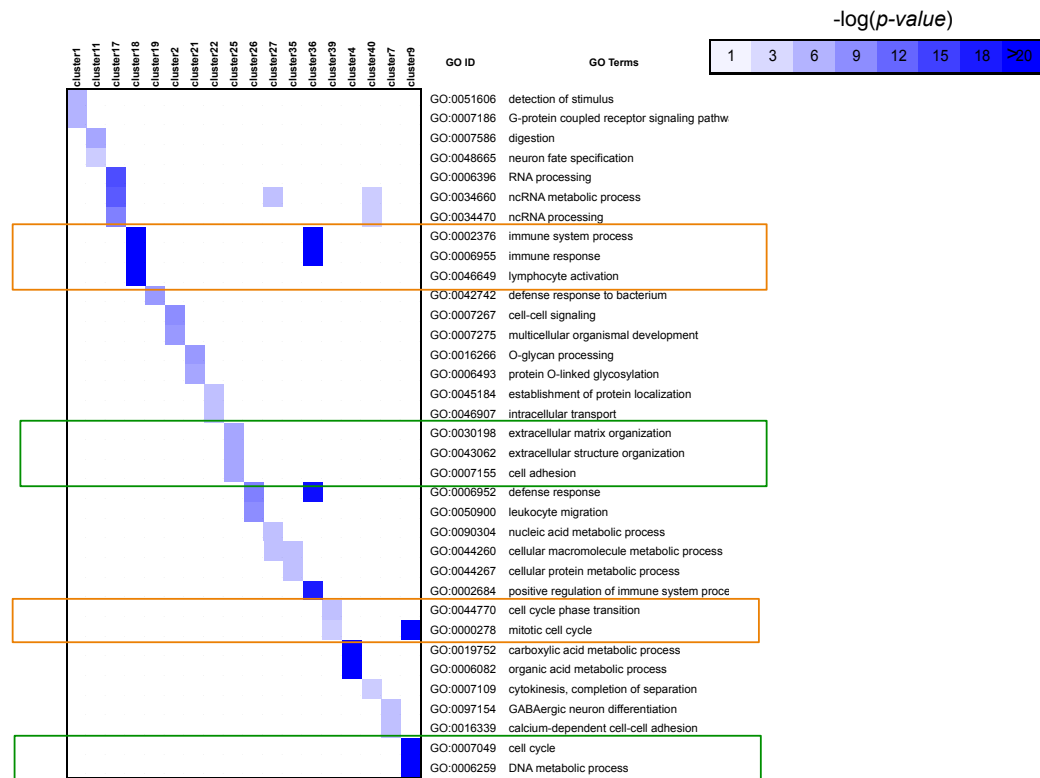

**B**

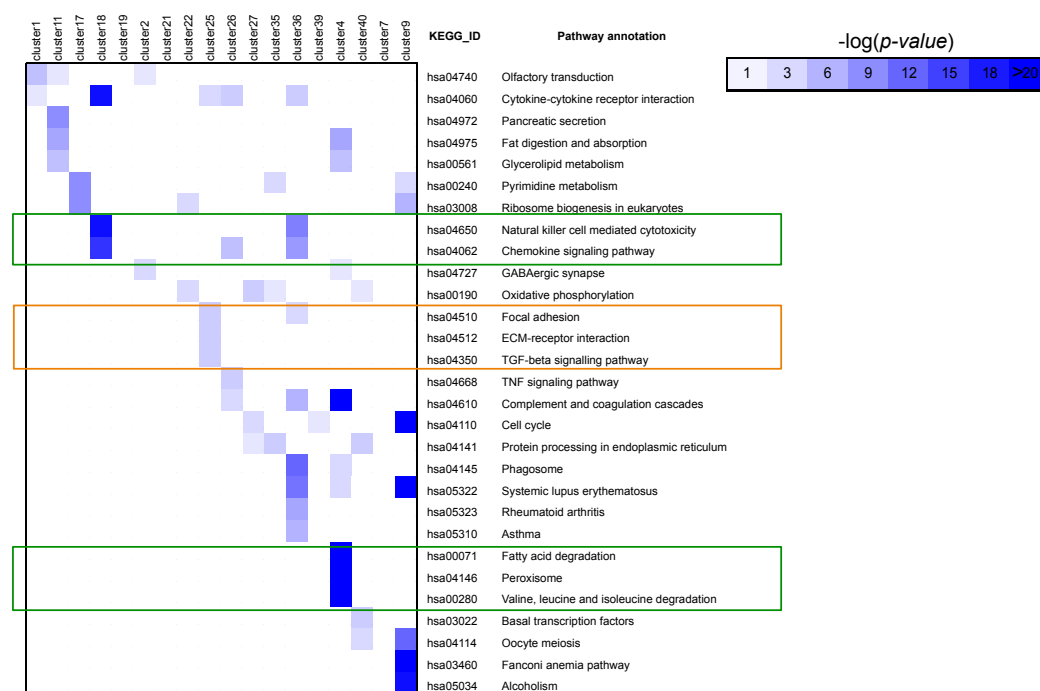

**Supplementary Figure 11. GO and Pathway enrichment heatmap for all subclusters defined by co-expression network.** Function enrichment for protein-coding genes from various sub-clusters which defined by co-expression network. **(A)** GO enrichment; **(B)** KEGG pathway enrichment.

**A**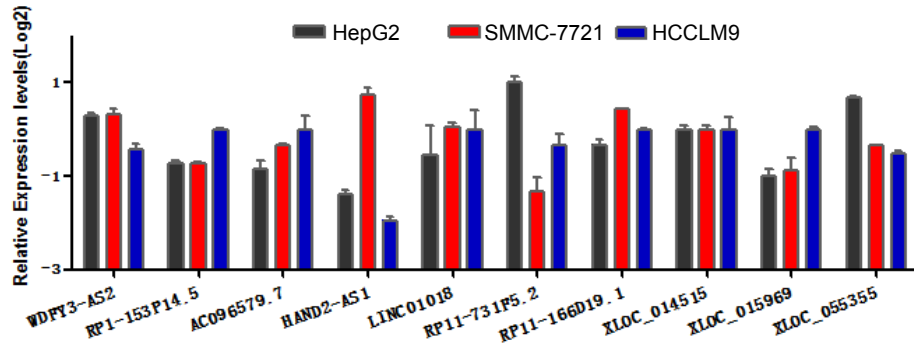**B**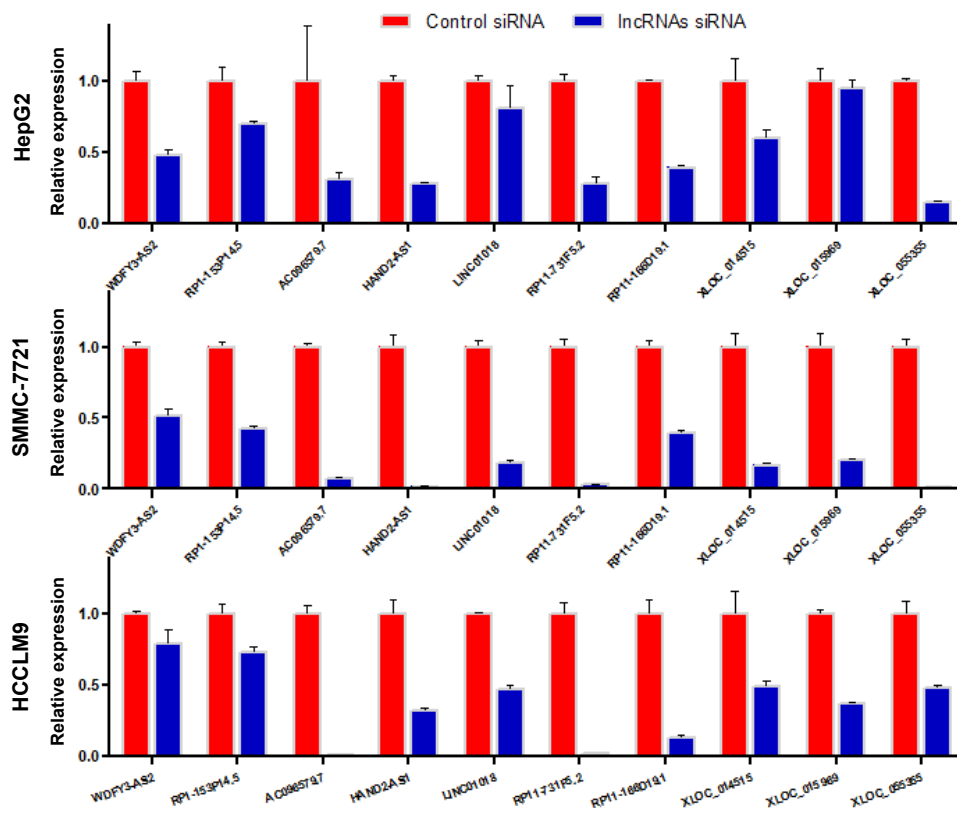

**Supplementary Figure 12. Knockdown of candidate lncRNAs in three liver cancer cell lines using siRNA mixture.** Knockdown of candidate lncRNAs in three liver cancer cell lines using siRNA mixtures. (A) The relative expression levels of all 10 candidate lncRNAs in three liver cancer cell lines, including HepG2 (black), SMMC-7721 (red) and HCCLM9 (blue) cell lines. (B) The relative expression levels of all candidate lncRNAs after knockdown using siRNA mixture (blue) or after treatment with control siRNA (red). Error bars represent the s.d. of three experiment replicates.

**A**

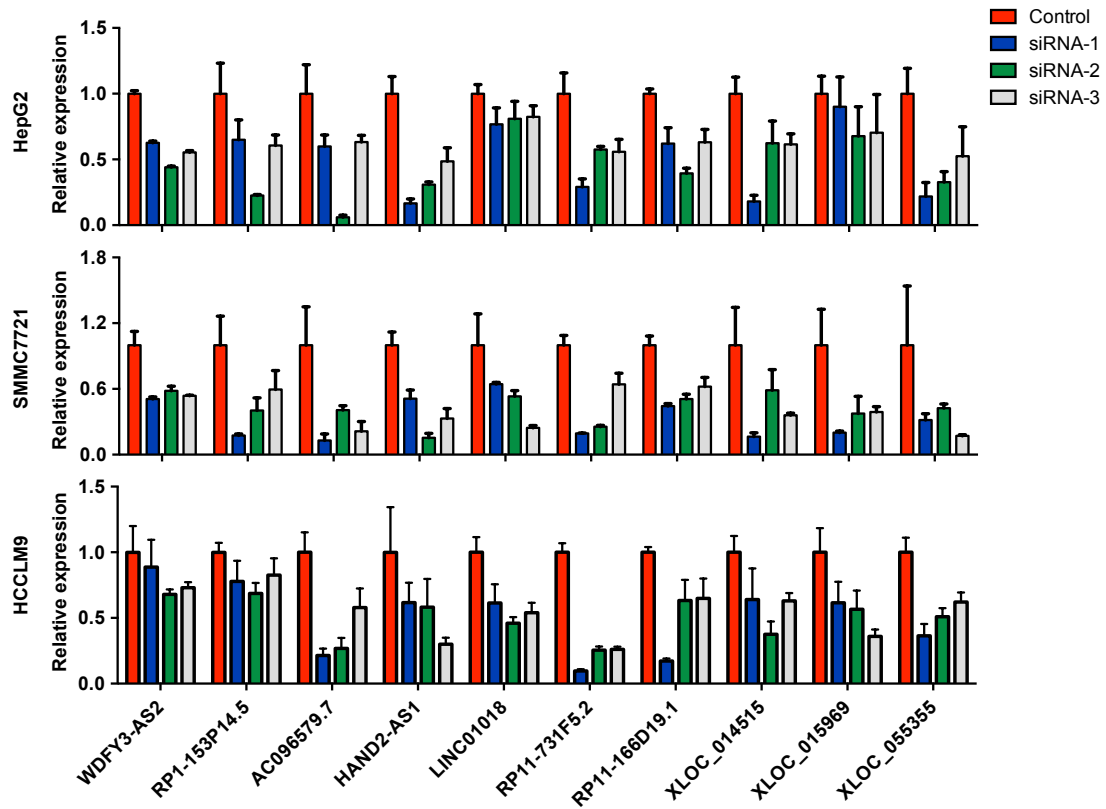

**B**

| lncRNA           | HepG2   |         |         |         | SMMC-7721 |         |         |         | HCCLM9  |         |         |         |
|------------------|---------|---------|---------|---------|-----------|---------|---------|---------|---------|---------|---------|---------|
|                  | mixture | siRNA-1 | siRNA-2 | siRNA-3 | mixture   | siRNA-1 | siRNA-2 | siRNA-3 | mixture | siRNA-1 | siRNA-2 | siRNA-3 |
| WDFY3-AS2        | *       | *       | **      | ***     | ***       | **      | *       | *       |         |         |         |         |
| RP1-153P14.5     |         |         |         |         | **        | **      | *       | *       |         |         |         |         |
| AC096579.7       |         |         |         |         |           |         |         |         |         |         |         |         |
| HAND2-AS1        |         |         |         |         | **        | **      | **      | **      | **      | **      | **      | **      |
| LINC01018        |         |         |         |         |           |         |         |         |         |         |         |         |
| RP11-731F5.2     |         |         |         |         |           |         |         |         |         |         |         |         |
| RP11-166D19.1    | *       | *       | **      | *       |           |         |         |         | *       | *       | *       | *       |
| XLOC_014515      |         |         |         |         |           |         |         |         | **      | *       | *       | *       |
| XLOC_015969      |         |         |         |         |           |         |         |         | **      | *       | *       | *       |
| XLOC_055355      |         |         |         |         |           |         |         |         | **      | **      | *       | **      |
| Negative Control |         |         |         |         |           |         |         |         |         |         |         |         |

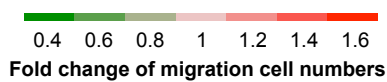

\*\*\* p-value<0.001 \*\*p-value<0.01 \*p-value<0.05

C.

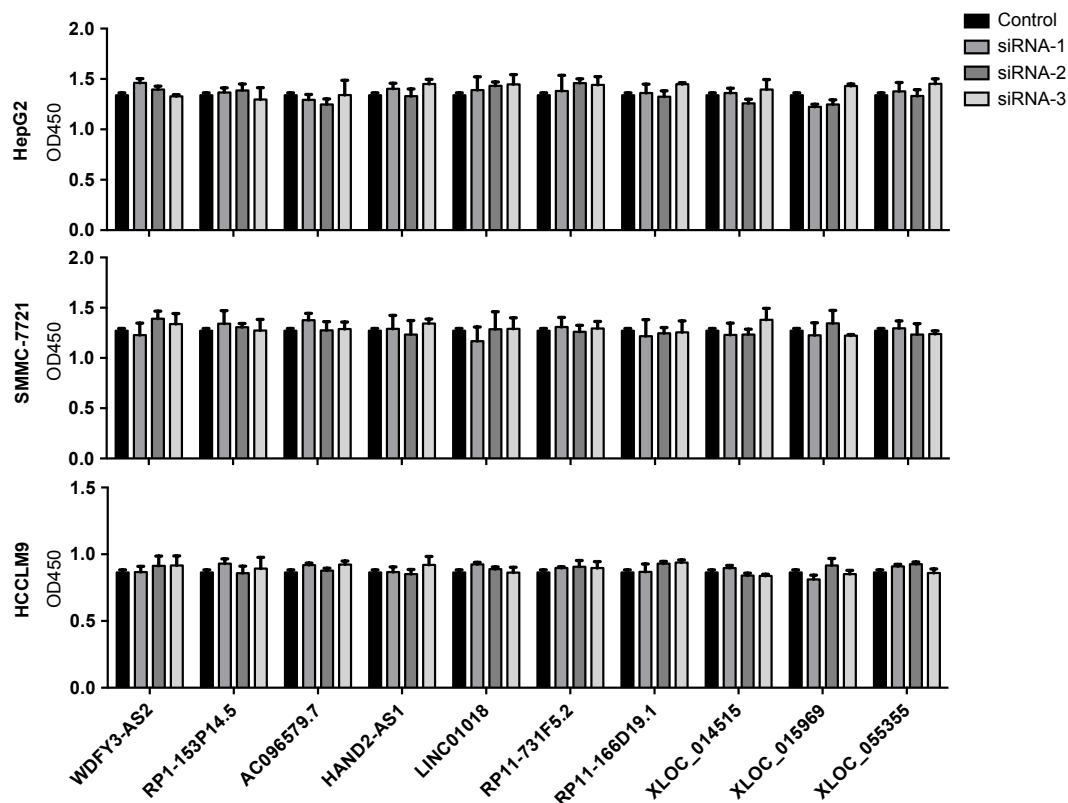

**Supplementary Figure 13. Knockdown of candidate lncRNAs in three liver cancer cell lines using three siRNA separately.**

Knockdown of candidate lncRNAs in three liver cancer cell lines using three siRNA separately. **(A)** The relative expression levels of all candidate lncRNAs after knockdown using all three siRNA separately or after treatment with control siRNA in three liver cancer cell lines (HepG2, SMMC-7721 and HCCLM9). **(B)** The heatmap depicting the transwell migration assays for all candidate lncRNAs. The values in the heatmap showing the fold-change ( $P$ -value<0.05) of the migration cell numbers of knockdown cells using siRNA mixtures and three siRNAs separately over those of control cells. All results are expressed as the mean derived from three independent experiments. Student's unpaired  $t$ -test was used for comparison of knockdown cells and control cells. Details of the heatmap values are shown in Supplementary File 10. \* $P$ -value<0.05, \*\* $P$ -value<0.01, \*\*\* $P$ -value<0.001,  $t$ -test,  $n=3$ . **(C)** The barcharts showing the CCK8 cell proliferation assays for all candidate lncRNAs. The column values represent OD450 values of three liver cancer cell lines after knockdown of candidate lncRNAs using three siRNAs separately or after treatment with control siRNA. We repeated every siRNA's experiment three times; and details of all values are shown in Supplementary File 11. Error bars represent the s.d. of three experiment replicates.

## Supplementary Tables

**Supplementary Table 1. Filtering steps for identifying newly assembled lncRNAs**

| Step                                |                                     | Parameters                      | Transcript                 |              |
|-------------------------------------|-------------------------------------|---------------------------------|----------------------------|--------------|
| <b>Filter</b>                       | 0.Merged transcriptome              | NA                              | 393,479                    |              |
|                                     | 1.Filter by annotation <sup>1</sup> | No overlap                      | 73,067                     |              |
|                                     | 2.Filter by length                  | length > 200bp                  | 72,065                     |              |
|                                     | 3.Filter by strand                  | strandness                      | 68,095                     |              |
|                                     | 4.Annotate by exon number           | exon number                     | mono-exonic                | multi-exonic |
|                                     |                                     |                                 | 51,535                     | 16,560       |
|                                     | 5.filter by distance                | distance > 2000bp               | 46,726                     |              |
|                                     | 6.filter by expression              | FPKM > 0.5 in at least 1 sample | 9,908                      |              |
|                                     | 7.novel transcript                  | NA                              | 26,468                     |              |
|                                     | 8.Filter by CPC                     | default                         | 10,449                     |              |
| 9.Filter by COME                    | default                             | 10,196                          |                            |              |
| <b>Total newly assembled lncRNA</b> |                                     |                                 | <b>10,196 (8,603 gene)</b> |              |

<sup>1</sup>We used protein-coding genes (exons) and lncRNAs (exons) annotated in Gencode (V19) as the known annotations.



**Supplementary Table 2. Candidate lncRNAs for loss-of-function assay**

| <b>lncRNAs name</b>  | <b>ENSEMBL ID</b> | <b>lncRNA significantly correlated cell adhesion genes</b>                                                                                           | <b>cluster</b> |
|----------------------|-------------------|------------------------------------------------------------------------------------------------------------------------------------------------------|----------------|
| WDFY3-AS2            | ENSG00000180769   | CD4, SRPX, BMX, ENG, CXCL12, STAB2, MMRN1, DPT, ITGAD, BMP10, MFAP4, TNXB, DSCAM                                                                     | 25             |
| RP1-153P14.5         | ENSG00000227920   | LY9, ITGA9, LAMA2                                                                                                                                    | 18             |
| <b>AC096579.7</b>    | ENSG00000231486   | CD6, EPHA3, LAMC3, SRPX, AEBP1, ENG, CXCL12, SELPLG, CPXM2, LY9, OMD, ISLR, EMILIN1, MMRN1, DPT, ITGA9, CD226, CD96, SVEP1, MFAP4, TNXB, SELP, LAMA2 | 18             |
| <b>HAND2-AS1</b>     | ENSG00000237125   | EPHA3, LAMC3, SRPX, BMX, ENG, CXCL12, CPXM2, CLDN10, STAB2, MMRN1, DPT, ITGA9, CD226, BMP10, SVEP1, MFAP4, TNXB, SELP, LAMA2                         | 25             |
| <b>LINC01018</b>     | ENSG00000250056   | CDHR5, MPDZ, GNE, AZGP1, DSCAM, COL18A1                                                                                                              | 4              |
| <b>RP11-731F5.2</b>  | ENSG00000253364   | CD6, SIGLEC6                                                                                                                                         | 25             |
| <b>RP11-166D19.1</b> | ENSG00000255248   | EPHA3, SRPX, AEBP1, PCDHB12, CPXM2, OMD, EMILIN1, COL6A2, IGFBP7, SVEP1, MFAP4, TNXB                                                                 | 25             |
| <b>XLOC_014515</b>   | -                 | AMBP, STAB2, GNE, AZGP1, BMP10, DSCAM, COL18A1                                                                                                       | 4              |
| XLOC_015969          | -                 | GP1BA, DPT, MMRN1                                                                                                                                    | 1              |
| <b>XLOC_055355</b>   | -                 | ITGA2B, COL19A1, LAMA1, ADAM2, IGSF11, NCAM2                                                                                                         | 25             |

1. Cell adhesion gene list were derived from gene ontology annotation (GO:0007155) (<http://geneontology.org/>);
2. lncRNAs in bold are metastasis-associated recurrently deregulated lncRNAs.

**Supplementary Table 3. siRNA sequence used for candidate lncRNAs**

| lncRNA Name      | GENCODE ID      | siRNA No. | siRNA sense sequences    | siRNA antisense sequences |
|------------------|-----------------|-----------|--------------------------|---------------------------|
| WDFY3-AS2        | ENSG00000180769 | siRNA-1   | GCCUAGAAAUGGCAUGCAUTT    | AUGCAUGCCAUUUCUAGGCTT     |
|                  |                 | siRNA-2   | GCCAUACCCUUGACCAGAATT    | UUCUGGUCAAGGGUAUGGCTT     |
|                  |                 | siRNA-3   | GCUGUUUGAAUCAGGAAUATT    | UAUUCUGAUUCAACAGCTT       |
| RP1-153P14.5     | ENSG00000227920 | siRNA-1   | GCAUGCAUGUUAGCAUGACTT    | GUCAUGCUAACAUGCAUGCTT     |
|                  |                 | siRNA-2   | GGGCAUUCUGAAUGAGUGTT     | CACUCAUUCAGGAAUGCCCTT     |
|                  |                 | siRNA-3   | GACAGAGAGGUUGACACAATT    | UUGUGUCAACCUCUCUGUCTT     |
| AC096579.7       | ENSG00000231486 | siRNA-1   | CCGGACAAAGGACUUUGCUTT    | AGCAAAGUCCUUUGUCCGGTT     |
|                  |                 | siRNA-2   | GGCAAAGAAGCAGCUCUUUTT    | AAAGAGCUGCUUCUUUGCCTT     |
|                  |                 | siRNA-3   | GGGAAUCCAGGACAGAUATT     | AUAUCUGUCCUGGAUUCCTT      |
| HAND2-AS1        | ENSG00000237125 | siRNA-1   | GCCAAGGUACAUCUCAGAUATT   | AUCUGAGAUGUACCUUGGCTT     |
|                  |                 | siRNA-2   | CCUCUUGACUUGCCAGUAUTT    | AUACUGGCAAGUCAAGAGGTT     |
|                  |                 | siRNA-3   | GCUGGUACUGUCACUUAUATT    | UAUAAGUGACAGUACCAGCTT     |
| LINC01018        | ENSG00000250056 | siRNA-1   | CCAUCAUAACCUCAUCAATT     | UUGAUGAGGUUAUUGAUGGTT     |
|                  |                 | siRNA-2   | GGUGACUGAUUUGCGGCAATT    | UUGCCGCAAUCAGUCACCTT      |
|                  |                 | siRNA-3   | CCUAAUGCCUCUGCAUUAATT    | UUAUUGCAGAGGCAUUAAGGTT    |
| RP11-731F5.2     | ENSG00000253364 | siRNA-1   | CGCCGGUUUCAUCCUGUUTT     | AACAGGAUUGAAACCGGCGTT     |
|                  |                 | siRNA-2   | GGAGACAAAUAGCAGCUGTT     | CAGCUGCUAUUUGUCUUCCTT     |
|                  |                 | siRNA-3   | GCAAGUCUGCCCACAUGUATT    | UACAUGUGGCAGACUUGCTT      |
| RP11-166D19.1    | ENSG00000255248 | siRNA-1   | CCACCAGCCUACUGAGAUUTT    | AAUCUCAGUAGGCUGGUGGTT     |
|                  |                 | siRNA-2   | GCAUAAGUUGACCUUGCUUTT    | AAGCAAGGUCAACUUAUGCTT     |
|                  |                 | siRNA-3   | GCCUUUCCAUCAAGAUAGTT     | CUAUCUUGAUGGAAAGGGCTT     |
| XLOC_014515      | XLOC_014515     | siRNA-1   | CCAUGGACACAGAAACCAATT    | UUGGUUUCUGUGUCCAUGGTT     |
|                  |                 | siRNA-2   | GGAGGUCUUCUACUUAUAGAUATT | AUCUAAGUAGAAGACCUCCTT     |
|                  |                 | siRNA-3   | CCAGGCACGUUGCACUUAUUTT   | AAUAGUGCAACGUGCCUGGTT     |
| XLOC_015969      | XLOC_015969     | siRNA-1   | GGAAAGACCUGGGAGUCUUTT    | AAGACUCCAGGUCUUUCCTT      |
|                  |                 | siRNA-2   | GCACUCAAAUCGGCCUUUTT     | AAAGGGCCGAUUUGAGUGCTT     |
|                  |                 | siRNA-3   | GCCAGUUCUCGCAUGAGAUATT   | AUCUCAUGCGAGAACUGGCTT     |
| XLOC_055355      | XLOC_055355     | siRNA-1   | GCACGCAAGCAUAAUUAUATT    | UUAUUAUUAUGCUUGCGUGCTT    |
|                  |                 | siRNA-2   | GCAAGAACUUAUGGGCUUATT    | UAAGCCCAUAGAUCUUGCTT      |
|                  |                 | siRNA-3   | GCAUUCUUCUUAACCACAATT    | UUGUGGUUAAGAAGAAUGCTT     |
| Negative control |                 |           | UUCUCCGAACGUGUCACGUTT    | ACGUGACACGUUCGGAGAATT     |

**Supplementary Table 4. qPCR primer sequences used for candidate lncRNAs**

| <b>lncRNA Name</b>   | <b>GENCODE ID</b>      | <b>Forward/Reverse</b> | <b>Sequence</b>         | <b>Tm (°C)</b> | <b>Product size (bp)</b> |
|----------------------|------------------------|------------------------|-------------------------|----------------|--------------------------|
| <b>WDFY3-AS2</b>     | <b>ENSG00000180769</b> | Forward primer         | CTCACCTCCTCAGTCCCA      | 61.2           | 116                      |
|                      |                        | Reverse primer         | CGTTTCTCCATCGCCTCTG     | 61.9           |                          |
| <b>RP1-153P14.5</b>  | <b>ENSG00000227920</b> | Forward primer         | CACTGGGCTACACAACGGACA   | 62.6           | 116                      |
|                      |                        | Reverse primer         | CCCCAATTTACTGACAAGGCAAC | 60.3           |                          |
| <b>AC096579.7</b>    | <b>ENSG00000231486</b> | Forward primer         | TTCTTTCTGCTTTAGCTTGACT  | 55.5           | 138                      |
|                      |                        | Reverse primer         | AATCAGGTTCCAAGCACCA     | 59.1           |                          |
| <b>HAND2-AS1</b>     | <b>ENSG00000237125</b> | Forward primer         | CTGTAAACTCTGACTTGCTG    | 51             | 75                       |
|                      |                        | Reverse primer         | TAATAACGGTTAAGTTGCCAT   | 54.2           |                          |
| <b>LINC01018</b>     | <b>ENSG00000250056</b> | Forward primer         | TATCGGCCATTTGTATGTCCT   | 59.3           | 132                      |
|                      |                        | Reverse primer         | TGTTAGACACCCCATCCAT     | 60.1           |                          |
| <b>RP11-731F5.2</b>  | <b>ENSG00000253364</b> | Forward primer         | TTCTCCATCCCAGCTCGCCTT   | 63.6           | 163                      |
|                      |                        | Reverse primer         | GTGTGAACTCCACGCTGCAA    | 61.4           |                          |
| <b>RP11-166D19.1</b> | <b>ENSG00000255248</b> | Forward primer         | CACTTCATGCTGCTATGTCG    | 58             | 198                      |
|                      |                        | Reverse primer         | TCTTCTCAGGCACAATCCTC    | 57.9           |                          |
| <b>XLOC_014515</b>   | <b>XLOC_014515</b>     | Forward primer         | CCTGGGTCCTATTACGTGCCAA  | 65.2           | 82                       |
|                      |                        | Reverse primer         | CGCCTGTCTCCAGATGCT      | 61.5           |                          |
| <b>XLOC_015969</b>   | <b>XLOC_015969</b>     | Forward primer         | CACAGCCACTCACCACATGC    | 63.9           | 127                      |
|                      |                        | Reverse primer         | TCGGGATCTCTGCTCTCACC    | 65.4           |                          |
| <b>XLOC_055355</b>   | <b>XLOC_055355</b>     | Forward primer         | CAAAATCAGACCGTAAGGGA    | 57.7           | 105                      |
|                      |                        | Reverse primer         | TCACCCCTTTCATCTAAGCC    | 59.1           |                          |

**Supplementary Table 5. Transwell migration assays in all three liver cancer cell lines for candidate lncRNAs**

| lncRNA           |                 | siRNA No. | #Migration cell |     |     |           |     |     |        |     |     |
|------------------|-----------------|-----------|-----------------|-----|-----|-----------|-----|-----|--------|-----|-----|
|                  |                 |           | HepG2           |     |     | SMMC-7721 |     |     | HCCLM9 |     |     |
| Negative control |                 | -         | 548             | 510 | 522 | 281       | 299 | 328 | 385    | 362 | 321 |
| WDFY3-AS2        | ENSG00000180769 | siRNA-1   | 352             | 348 | 426 | 187       | 195 | 223 | 390    | 334 | 409 |
|                  |                 | siRNA-2   | 304             | 347 | 308 | 206       | 219 | 222 | 417    | 398 | 435 |
|                  |                 | siRNA-3   | 334             | 351 | 379 | 223       | 201 | 221 | 357    | 429 | 409 |
| RP1-153P14.5     | ENSG00000227920 | siRNA-1   | 557             | 628 | 598 | 191       | 186 | 230 | 331    | 356 | 359 |
|                  |                 | siRNA-2   | 626             | 647 | 558 | 229       | 258 | 236 | 351    | 366 | 379 |
|                  |                 | siRNA-3   | 558             | 564 | 527 | 234       | 256 | 225 | 365    | 334 | 354 |
| AC096579.7       | ENSG00000231486 | siRNA-1   | 501             | 487 | 463 | 279       | 305 | 340 | 383    | 337 | 338 |
|                  |                 | siRNA-2   | 457             | 493 | 496 | 272       | 263 | 317 | 366    | 364 | 339 |
|                  |                 | siRNA-3   | 495             | 499 | 463 | 292       | 316 | 263 | 295    | 325 | 313 |
| HAND2-AS1        | ENSG00000237125 | siRNA-1   | 578             | 513 | 580 | 167       | 148 | 183 | 179    | 186 | 207 |
|                  |                 | siRNA-2   | 491             | 508 | 563 | 188       | 203 | 189 | 166    | 177 | 190 |
|                  |                 | siRNA-3   | 554             | 512 | 583 | 146       | 150 | 206 | 165    | 151 | 166 |
| LINC01018        | ENSG00000250056 | siRNA-1   | 434             | 501 | 455 | 227       | 254 | 309 | 330    | 329 | 272 |
|                  |                 | siRNA-2   | 499             | 522 | 512 | 292       | 307 | 235 | 297    | 324 | 339 |
|                  |                 | siRNA-3   | 588             | 536 | 558 | 239       | 283 | 253 | 291    | 340 | 389 |
| RP11-731F5.2     | ENSG00000253364 | siRNA-1   | 602             | 643 | 546 | 331       | 344 | 353 | 314    | 281 | 245 |
|                  |                 | siRNA-2   | 599             | 606 | 544 | 335       | 327 | 331 | 318    | 319 | 342 |
|                  |                 | siRNA-3   | 594             | 585 | 512 | 292       | 273 | 336 | 342    | 331 | 296 |
| RP11-166D19.1    | ENSG00000255248 | siRNA-1   | 624             | 606 | 564 | 245       | 261 | 255 | 426    | 433 | 443 |
|                  |                 | siRNA-2   | 705             | 686 | 765 | 241       | 311 | 316 | 439    | 426 | 409 |
|                  |                 | siRNA-3   | 596             | 656 | 645 | 260       | 267 | 291 | 441    | 430 | 398 |
| XLOC_014515      | XLOC_014515     | siRNA-1   | 495             | 468 | 516 | 375       | 325 | 385 | 398    | 433 | 437 |
|                  |                 | siRNA-2   | 493             | 496 | 473 | 356       | 343 | 316 | 405    | 428 | 468 |
|                  |                 | siRNA-3   | 459             | 504 | 486 | 295       | 289 | 351 | 406    | 414 | 451 |
| XLOC_015969      | XLOC_015969     | siRNA-1   | 544             | 509 | 605 | 289       | 273 | 306 | 445    | 419 | 417 |
|                  |                 | siRNA-2   | 558             | 531 | 485 | 261       | 293 | 295 | 477    | 414 | 475 |
|                  |                 | siRNA-3   | 564             | 515 | 528 | 257       | 329 | 337 | 441    | 478 | 499 |
| XLOC_055355      | XLOC_055355     | siRNA-1   | 450             | 487 | 506 | 310       | 322 | 300 | 187    | 186 | 171 |
|                  |                 | siRNA-2   | 480             | 466 | 526 | 337       | 295 | 345 | 195    | 183 | 187 |
|                  |                 | siRNA-3   | 401             | 408 | 530 | 299       | 307 | 280 | 209    | 201 | 182 |

**Supplementary Table 6. CCK8 cell proliferation assays in all three liver cancer cell lines for candidate lncRNAs**

| lncRNA           |                 | siRNA No. | OD450 |       |       |           |       |       |        |       |       |
|------------------|-----------------|-----------|-------|-------|-------|-----------|-------|-------|--------|-------|-------|
|                  |                 |           | HepG2 |       |       | SMMC-7721 |       |       | HCCLM9 |       |       |
| Negative control |                 | -         | 1.36  | 1.314 | 1.345 | 1.287     | 1.248 | 1.282 | 0.883  | 0.845 | 0.866 |
| WDFY3-AS2        | ENSG00000180769 | siRNA-1   | 1.48  | 1.41  | 1.487 | 1.139     | 1.184 | 1.362 | 0.907  | 0.822 | 0.872 |
|                  |                 | siRNA-2   | 1.374 | 1.383 | 1.433 | 1.47      | 1.319 | 1.385 | 0.844  | 0.991 | 0.904 |
|                  |                 | siRNA-3   | 1.347 | 1.319 | 1.319 | 1.215     | 1.395 | 1.401 | 0.982  | 0.84  | 0.927 |
| RP1-153P14.5     | ENSG00000227920 | siRNA-1   | 1.398 | 1.383 | 1.312 | 1.33      | 1.477 | 1.217 | 0.971  | 0.901 | 0.918 |
|                  |                 | siRNA-2   | 1.458 | 1.365 | 1.336 | 1.33      | 1.263 | 1.326 | 0.878  | 0.8   | 0.899 |
|                  |                 | siRNA-3   | 1.234 | 1.226 | 1.433 | 1.39      | 1.168 | 1.261 | 0.802  | 0.966 | 0.912 |
| AC096579.7       | ENSG00000231486 | siRNA-1   | 1.351 | 1.274 | 1.25  | 1.305     | 1.387 | 1.438 | 0.924  | 0.903 | 0.931 |
|                  |                 | siRNA-2   | 1.29  | 1.268 | 1.185 | 1.222     | 1.375 | 1.228 | 0.883  | 0.859 | 0.893 |
|                  |                 | siRNA-3   | 1.51  | 1.245 | 1.267 | 1.367     | 1.23  | 1.266 | 0.954  | 0.91  | 0.907 |
| HAND2-AS1        | ENSG00000237125 | siRNA-1   | 1.423 | 1.442 | 1.338 | 1.372     | 1.363 | 1.136 | 0.912  | 0.846 | 0.842 |
|                  |                 | siRNA-2   | 1.254 | 1.341 | 1.396 | 1.216     | 1.38  | 1.106 | 0.881  | 0.814 | 0.86  |
|                  |                 | siRNA-3   | 1.472 | 1.481 | 1.399 | 1.293     | 1.371 | 1.368 | 0.859  | 0.985 | 0.916 |
| LINC01018        | ENSG00000250056 | siRNA-1   | 1.539 | 1.323 | 1.306 | 1.04      | 1.319 | 1.143 | 0.907  | 0.932 | 0.935 |
|                  |                 | siRNA-2   | 1.445 | 1.39  | 1.464 | 1.377     | 1.087 | 1.398 | 0.884  | 0.907 | 0.876 |
|                  |                 | siRNA-3   | 1.401 | 1.559 | 1.382 | 1.217     | 1.417 | 1.239 | 0.87   | 0.821 | 0.898 |
| RP11-731F5.2     | ENSG00000253364 | siRNA-1   | 1.43  | 1.503 | 1.207 | 1.405     | 1.215 | 1.306 | 0.901  | 0.887 | 0.904 |
|                  |                 | siRNA-2   | 1.503 | 1.419 | 1.456 | 1.198     | 1.326 | 1.259 | 0.854  | 0.92  | 0.946 |
|                  |                 | siRNA-3   | 1.355 | 1.521 | 1.448 | 1.368     | 1.229 | 1.285 | 0.866  | 0.952 | 0.873 |
| RP11-166D19.1    | ENSG00000255248 | siRNA-1   | 1.383 | 1.263 | 1.432 | 1.408     | 1.116 | 1.125 | 0.845  | 0.936 | 0.825 |
|                  |                 | siRNA-2   | 1.346 | 1.259 | 1.369 | 1.204     | 1.226 | 1.31  | 0.926  | 0.917 | 0.949 |
|                  |                 | siRNA-3   | 1.447 | 1.465 | 1.434 | 1.271     | 1.36  | 1.134 | 0.958  | 0.937 | 0.92  |
| XLOC_014515      | XLOC_014515     | siRNA-1   | 1.404 | 1.31  | 1.366 | 1.366     | 1.167 | 1.157 | 0.876  | 0.901 | 0.914 |
|                  |                 | siRNA-2   | 1.305 | 1.238 | 1.231 | 1.207     | 1.199 | 1.294 | 0.861  | 0.829 | 0.833 |
|                  |                 | siRNA-3   | 1.31  | 1.503 | 1.376 | 1.474     | 1.252 | 1.412 | 0.828  | 0.836 | 0.852 |
| XLOC_015969      | XLOC_015969     | siRNA-1   | 1.245 | 1.226 | 1.197 | 1.114     | 1.361 | 1.204 | 0.82   | 0.777 | 0.839 |
|                  |                 | siRNA-2   | 1.226 | 1.301 | 1.215 | 1.478     | 1.22  | 1.337 | 0.857  | 0.954 | 0.938 |
|                  |                 | siRNA-3   | 1.453 | 1.426 | 1.413 | 1.219     | 1.217 | 1.234 | 0.821  | 0.87  | 0.865 |
| XLOC_055355      | XLOC_055355     | siRNA-1   | 1.462 | 1.287 | 1.378 | 1.334     | 1.211 | 1.341 | 0.895  | 0.91  | 0.924 |
|                  |                 | siRNA-2   | 1.261 | 1.353 | 1.38  | 1.212     | 1.35  | 1.14  | 0.944  | 0.922 | 0.91  |
|                  |                 | siRNA-3   | 1.422 | 1.51  | 1.425 | 1.21      | 1.272 | 1.237 | 0.883  | 0.871 | 0.825 |

## Supplementary References

1. Iyer, M.K. et al. The landscape of long noncoding RNAs in the human transcriptome. *Nature Genetics* **47**, 199-208 (2015).
2. Liu, C. et al. NONCODE: an integrated knowledge database of non-coding RNAs. *Nucleic acids research* **33**, D112-D115 (2005).
3. Pruitt, K.D. et al. RefSeq: an update on mammalian reference sequences. *Nucleic Acids Res* **42**, D756-763 (2014).
4. Kelley, D. & Rinn, J. Transposable elements reveal a stem cell-specific class of long noncoding RNAs. *Genome Biology* **13**, 243-253 (2012).
5. The ENCODE Project Consortium An integrated encyclopedia of DNA elements in the human genome. *Nature* **489**, 57-74 (2012).
6. Zhang, H. et al. Comparative transcriptome analysis reveals that the ECM-receptor interaction contributes to the venous metastases of hepatocellular carcinoma. *Cancer Genetics* **208**, 482-491 (2015).
7. Hoshida, Y. et al. Integrative transcriptome analysis reveals common molecular subclasses of human hepatocellular carcinoma. *Cancer Res* **69**, 7385-7392 (2009).
8. Kan, Z. et al. Whole-genome sequencing identifies recurrent mutations in hepatocellular carcinoma. *Genome Res* **23**, 1422-1433 (2013).
